# Supplementary material for: Meta-analysis of three randomized trials of capecitabine plus cisplatin (XP) versus S-1 plus cisplatin (SP) as first-line treatment for advanced gastric cancer
Source: Research Square preprint supplement (doi:10.21203/rs.3.rs-3109064/v1), 2023-07-07
Supplement: Supplementary file 1 [file 10c85d4fb96dee23eafb34a6.docx]

**Table S1** The overall response of SP vs. XP for patients without measurable lesion in the integrated analysis.

|  | Number of cases | CR | non-CR  / non-PD | PD | NE | CR+ non-CR/non-PD  [95%C.I.] | P-value |
| --- | --- | --- | --- | --- | --- | --- | --- |
| SP | 25 | 0 | 22 | 2 | 1 | 88.0%  [68.9%-97.5%] | 0.162 |
| XP | 23 | 1 | 15 | 6 | 1 | 69.6%  [47.1%-86.8%] |

CR, complete response; PD, progressive disease; NE, not evaluable; 95% CI, 95% confident interval.

**Table S2** Overall DCR

|  | DCR with measurable lesion | DCR without measurable lesion | DCR  [95%C.I.] | P-value |
| --- | --- | --- | --- | --- |
| SP | 83.5%  [73.5%-90.9%] | 88.0%  [68.9%-97.5%] | 84.6  [77.7%-91.5%] | 0.024 |
| XP | 72.3%  [61.4%-81.2%] | 69.6%  [47.1%-86.8%] | 71.7  [63.1%-80.3%] |

DCR, disease control rate; 95% CI, 95% confident interval.

**Table S3** Differences in the percentage with measurable lesions between differentiated and undifferentiated types

|  |  | Differentiated (DIFF) | Undifferentiated (UNDI) | *P*-value | OR [95%CI] |
| --- | --- | --- | --- | --- | --- |
| Measurable disease | Yes | 114 (69.5%) | 50 (30.5%) | *P*<0.001 | 4.05  [2.81, 7.89] |
|  | No | 18 (36.0%) | 32 (64.0%) |
